# Supplementary material for: Genome-Wide Association and Mendelian Randomization Analysis Reveal the Causal Relationship Between White Blood Cell Subtypes and Asthma in Africans
Source: Front Genet. 2021 Dec 2;12:749415. doi: 10.3389/fgene.2021.749415 (PMC8674726; doi:10.3389/fgene.2021.749415)
Supplement: Supplementary file 2 [file Table3.XLSX]

## Sheet: Overview
ST1: MR estimates of the effects of Lym on asthma.
ST2: MR estimates of the effects of Mon on asthma.
ST3:MR estimates of the effects of Neu on asthma.
ST4:MR estimates of the effects of WBCc on asthma.

## Sheet: ST1
ST1: MR estimates of the effects of Lym on asthma.
Method	Estimate	Std Error	95% CIL	CIU	P-value
IVW	-0.079	0.357	-0.779	0.621	0.825

## Sheet: ST2
ST2: MR estimates of the effects of Mon on asthma.
Method	Estimate	Std Error	95% CIL	CIU	P-value
Simple median	0.339	0.129	0.086	0.592	0.009
Weighted median	0.475	0.113	0.253	0.697	<0.001
Penalized weighted median	0.525	0.115	0.298	0.751	<0.001
IVW	0.38	0.081	0.221	0.539	<0.001
Penalized IVW	0.38	0.081	0.221	0.539	<0.001
Robust IVW	0.386	0.098	0.195	0.577	<0.001
Penalized robust IVW	0.386	0.098	0.195	0.577	<0.001
MR-Egger	0.347	0.207	-0.058	0.753	0.093
(intercept)	0.006	0.032	-0.058	0.069	0.862
Penalized MR-Egger	0.347	0.207	-0.058	0.753	0.093
(intercept)	0.006	0.032	-0.058	0.069	0.862
Robust MR-Egger	0.349	0.205	-0.053	0.751	0.089
(intercept)	0.006	0.025	-0.043	0.055	0.796
Penalized robust MR-Egger	0.349	0.205	-0.053	0.751	0.089
(intercept)	0.006	0.025	-0.043	0.055	0.796

## Sheet: ST3
ST3:MR estimates of the effects of Neu on asthma.
Method	Estimate	Std Error	95% CIL	CIU	P-value
Simple median	0.152	0.046	0.062	0.241	0.001
Weighted median	0.2	0.046	0.11	0.29	<0.001
Penalized weighted median	0.201	0.045	0.112	0.289	<0.001
IVW	0.189	0.029	0.133	0.245	<0.001
Penalized IVW	0.192	0.027	0.138	0.246	<0.001
Robust IVW	0.196	0.033	0.132	0.26	<0.001
Penalized robust IVW	0.197	0.032	0.135	0.26	<0.001
MR-Egger	0.341	0.059	0.226	0.456	<0.001
(intercept)	-0.05	0.017	-0.083	-0.016	0.003
Penalized MR-Egger	0.341	0.058	0.229	0.454	<0.001
(intercept)	-0.048	0.017	-0.08	-0.015	0.004
Robust MR-Egger	0.344	0.093	0.161	0.526	<0.001
(intercept)	-0.049	0.023	-0.094	-0.004	0.034
Penalized robust MR-Egger	0.345	0.094	0.161	0.529	<0.001
(intercept)	-0.048	0.023	-0.093	-0.003	0.038

## Sheet: ST4
ST4:MR estimates of the effects of WBCc on asthma.
Method	Estimate	Std Error	95% CIL	CIU	P-value
Simple median	0.151	0.058	0.038	0.265	0.009
Weighted median	0.144	0.055	0.036	0.251	0.009
Penalized weighted median	0.108	0.056	-0.001	0.218	0.053
IVW	0.185	0.039	0.108	0.262	<0.001
Penalized IVW	0.176	0.039	0.101	0.252	<0.001
Robust IVW	0.181	0.056	0.072	0.29	0.001
Penalized robust IVW	0.173	0.05	0.075	0.272	0.001
MR-Egger	0.254	0.094	0.07	0.438	0.007
(intercept)	-0.018	0.022	-0.061	0.025	0.417
Penalized MR-Egger	0.291	0.092	0.11	0.472	0.002
(intercept)	-0.022	0.021	-0.064	0.02	0.301
Robust MR-Egger	0.256	0.126	0.009	0.503	0.042
(intercept)	-0.019	0.026	-0.069	0.031	0.46
Penalized robust MR-Egger	0.281	0.123	0.04	0.523	0.023
(intercept)	-0.022	0.026	-0.073	0.029	0.397
